# Supplementary material
Source: publisher figshare collection journal article supplement (https://scielo.figshare.com/articles/dataset/_/5644453)
Supplement: Supplementary file 1 [file Table_1.xls]

## Sheet: Table_1
<b>Patient</b>	<b>Age</b>	<b>Pelvic floor muscle strength<a href="#TFN2">*</a></b>	<b>Pregnancies</b>	<b>Normal deliveries</b>	<b>Surgeries</b>	<b>Medicins for CNS and LUTS</b>	<b>Hormonal status</b>	<b>Smoking</b>
01	56	4	0	0	Hemorrhoidectomy	HRT	Menopause	No
02	62	1	5	5	TAH	HRT	Menopause	No
03	49	4	4	4	No	High blood pressure Clordalidone Elanapril	Fertile	No
04	43	3	2	1	Myomectomy	Captopril pressure Puran t4	Fertile	No
05	47	4	2	0	Caesarean section	OC, Nifedipine, Hydrochlorothiazide	Fertile	No
06	49	3	3	3	TAH	No	Fertile	No
07	51	2	6	4	No	No	Menopause	No
08	57	1	7	5	No	No	Menopause	Yes
09	66	1	8	4	TAH	Losartan, Hydrochlorothiazide	Menopause	No
10	51	4	2	1	TAH + Perineoplasty	Estradot + Testosterone	Menopause	Yes
