# Supplementary material
Source: publisher figshare collection journal article supplement (https://scielo.figshare.com/articles/dataset/_/5644453)
Supplement: Supplementary file 2 [file Table_2.xls]

## Sheet: Table_2
<b>Patient</b>	<b>Initial Pad test (g)</b>	<b>Final (End) Pad test (g)</b>	<b>Pad test after 1 month (g)</b>	<b>Pad test after 2 months (g)</b>	<b>Pad test after 3 months (g)</b>
01	2	1	0	2	2
02	6	2	0	5	4
03	13	23	10	12	--
04	16	21	10	31	29
05	7	2	5	3	--
06	6	3	5	11	--
07	11	10	4	3	6
08	25	27	20	19	16
09	70	5	22	16	15
10	16	0	--	2	--
